# Supplementary material for: Alkali metal-enhanced cerium manganese-based three-dimensional ordered macroporous catalyst for NO oxidation and soot combustion
Source: Royal Society of Chemistry journal article supplement (doi:10.1039/d4ta04434g), 2024-01-01
Supplement: d4ta04434g1.pdf [file d4ta04434g1.pdf]

Electronic Supplementary Material

**Alkali metal enhanced cerium manganese-based three-dimensional ordered macroporous catalyst for NO oxidation and soot combustion**

Xuebin Wang,<sup>a</sup> Miao He,<sup>a</sup> Ping Wang,<sup>a</sup> Jiasai Yao,<sup>a</sup> Jing Xiong,<sup>b</sup> Xin Zhang<sup>a</sup>, Xiaohua Sun,<sup>\*a</sup> Yuechang Wei<sup>\*b</sup> and Zhenxing Li<sup>\*a</sup>

<sup>a</sup>State Key Laboratory of Heavy Oil Processing, College of New Energy and Materials, China University of Petroleum (Beijing), Beijing 102249, China. E-mail: hua82@126.com; lizx@cup.edu.cn

<sup>b</sup>College of Science, China University of Petroleum (Beijing), Beijing 102249, China. E-mail: weiyu@cup.edu.cn

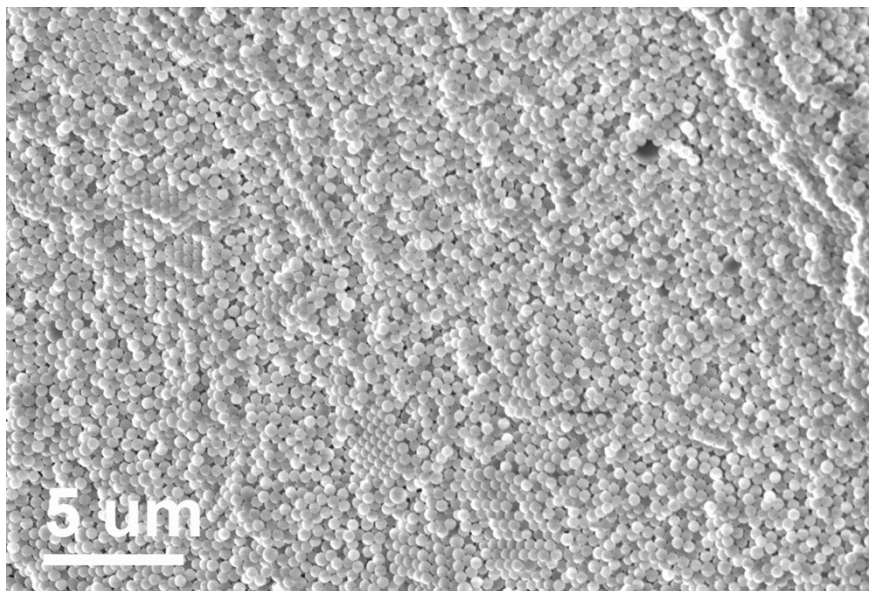

**Fig. S1.** SEM of PMMA

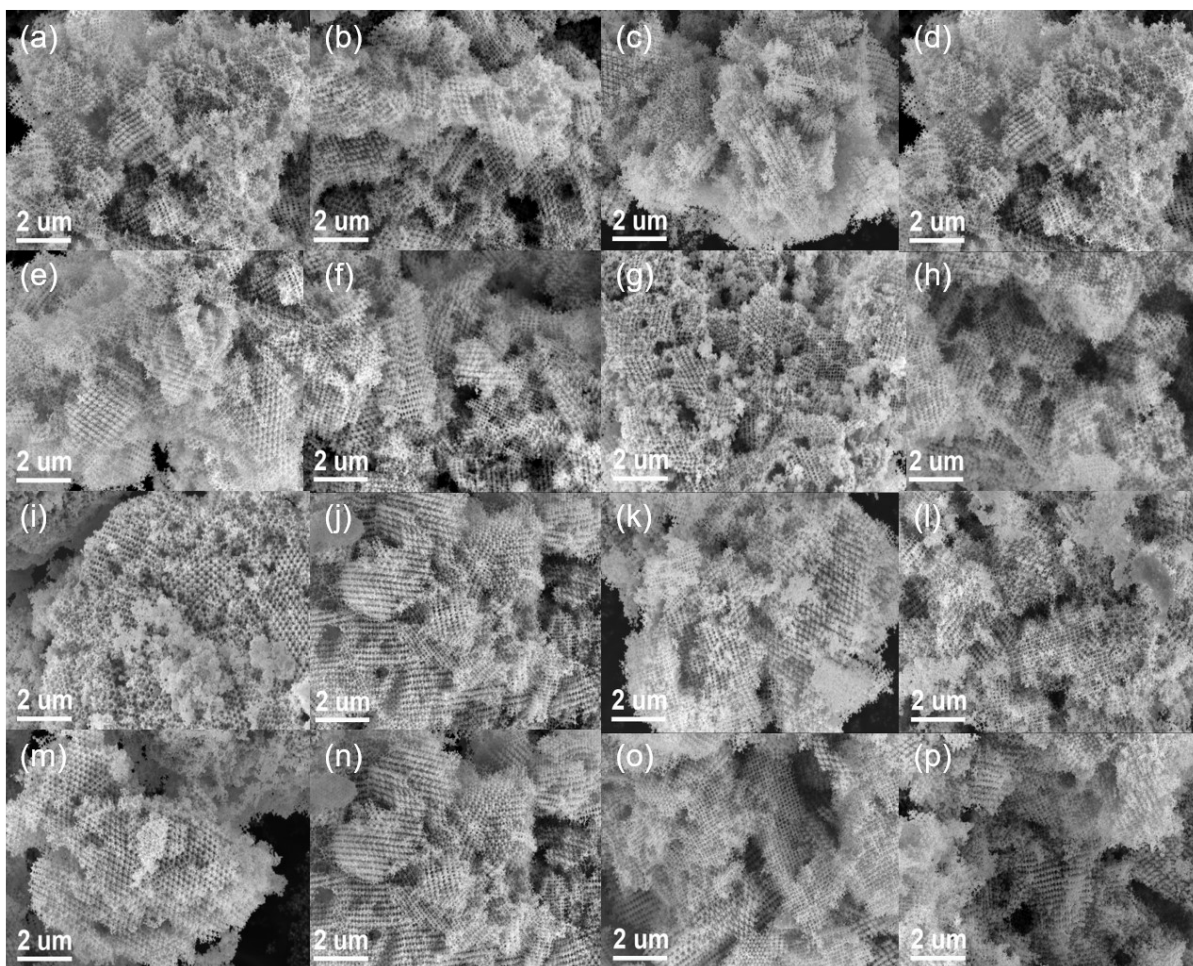

**Fig. S2.** SEM of (a)CM, (b)CM-3Li, (c)CM-5Li, (d)CM-8Li, (e)CM-3Na, (f)CM-5 Na, (g)CM-8 Na, (h)CM-3K, (i)CM-5K, (j)CM-8K, (k)CM-3Rb, (l)CM-5Rb, (m)CM-8 Rb, (n)CM-3Cs, (o)CM-5Cs, (p)CM-8Cs

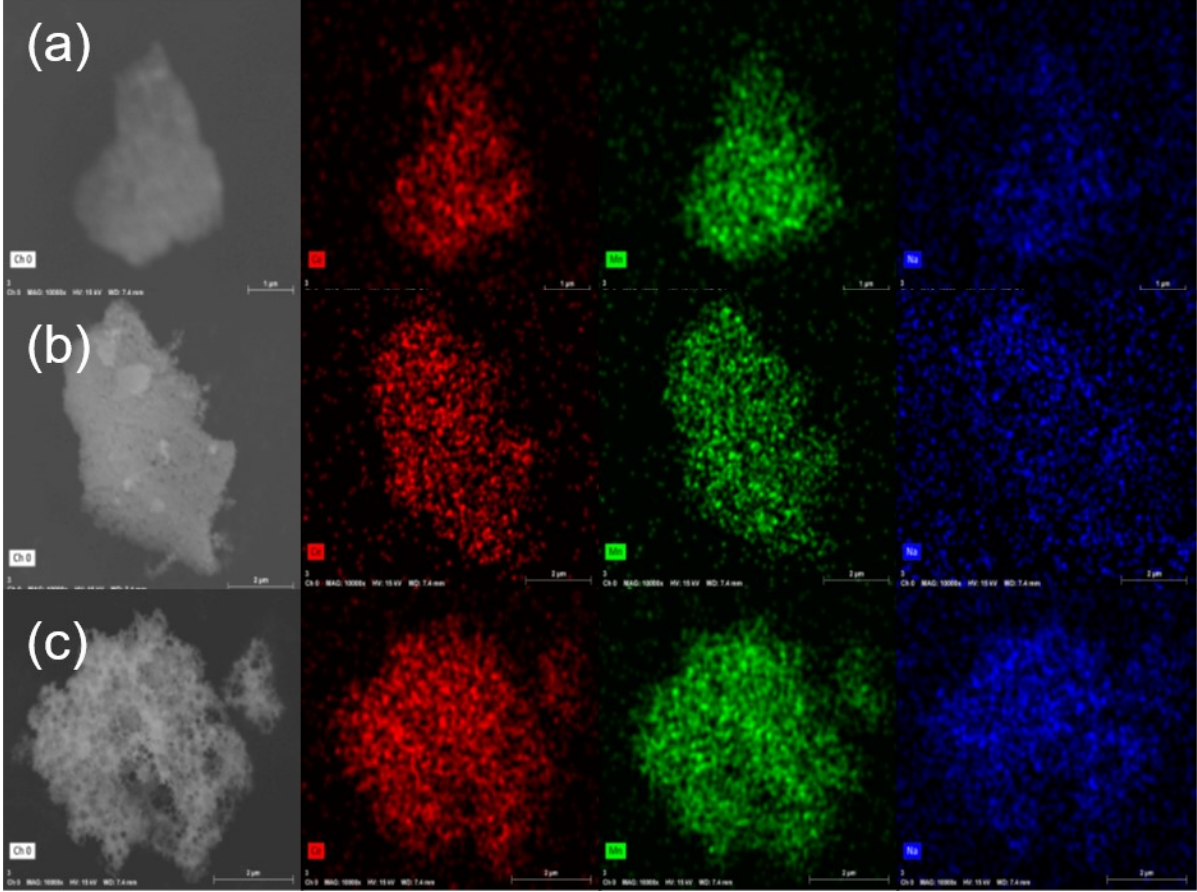

**Fig. S3.** EDS of (a)CM-3Li、(b)CM-5Li、(c)CM-8Li

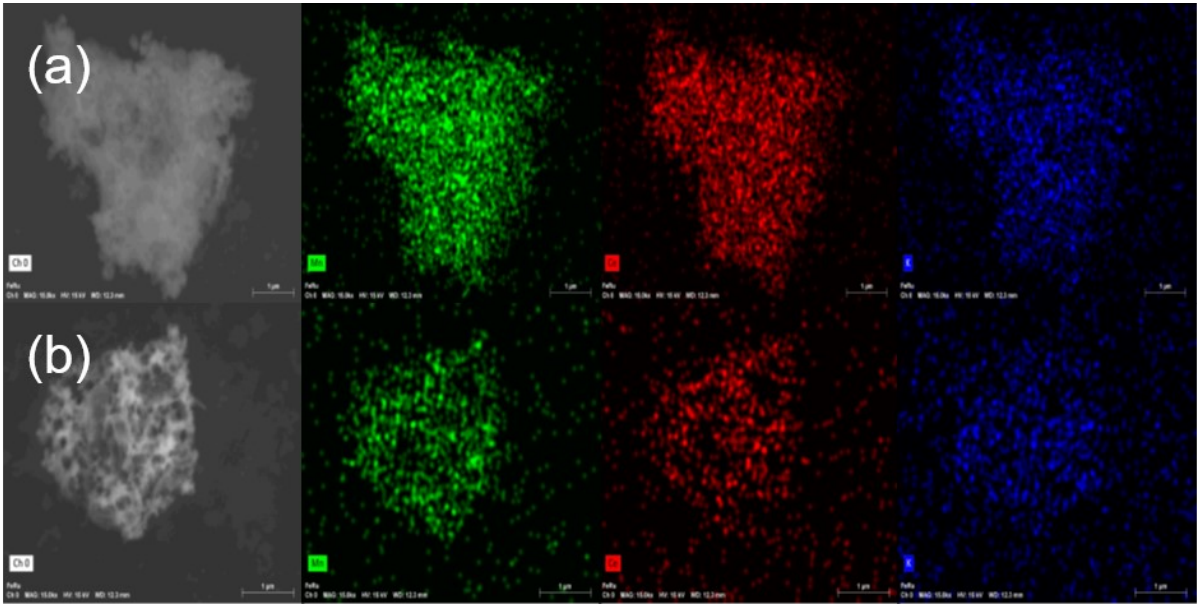

**Fig. S4.** EDS of (a)CM-3K、(b)CM-8K

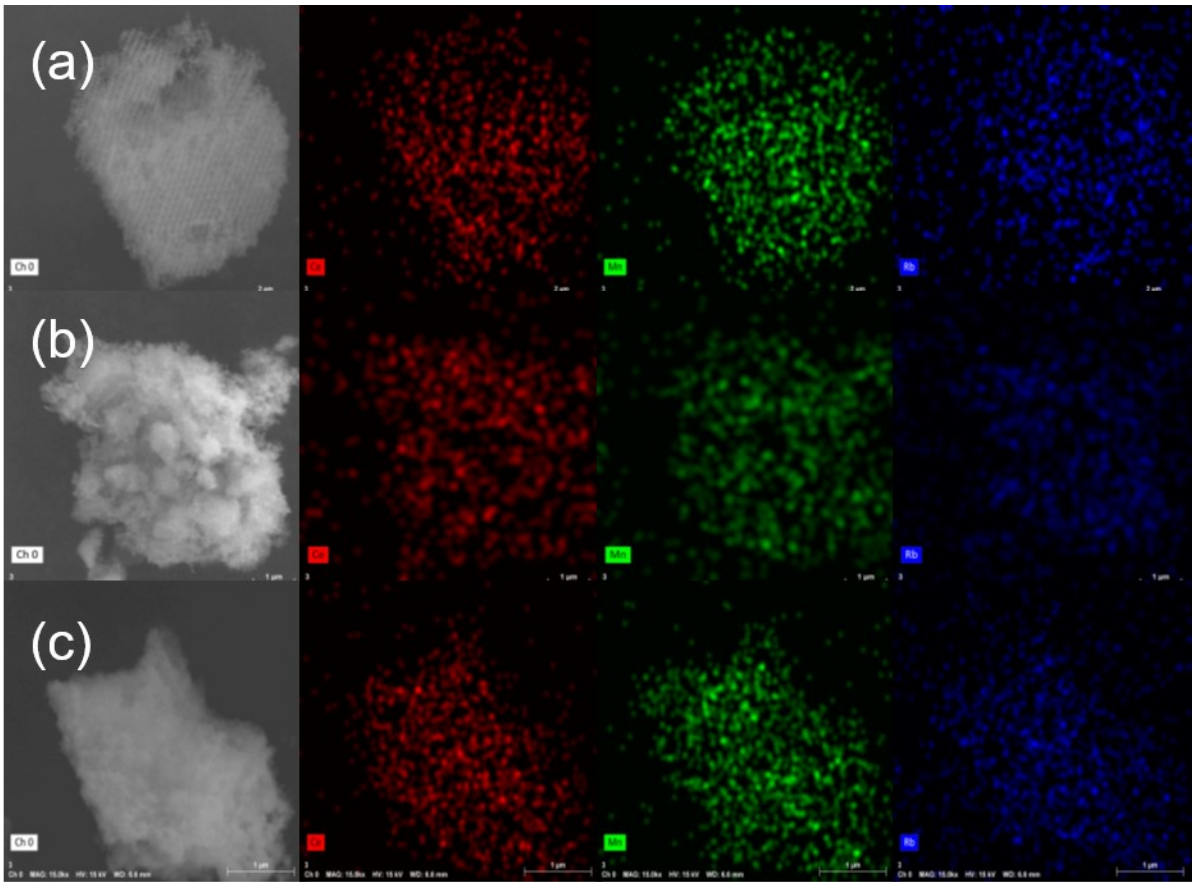

**Fig. S5.** EDS of (a)CM-3Rb、(b)CM-5Rb、(c)CM-8Rb

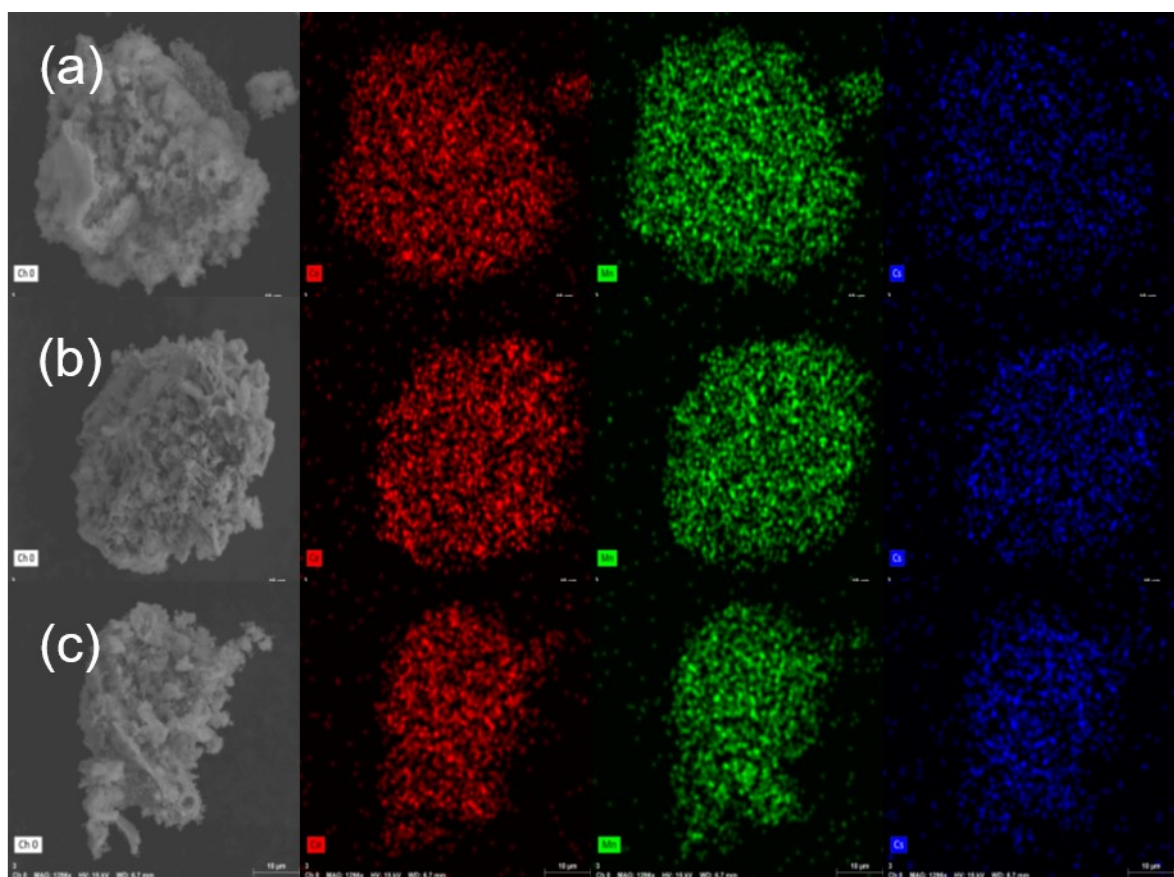

**Fig. S6** EDS of (a)CM-3Cs、(b)CM-5Cs、(c)CM-8Cs

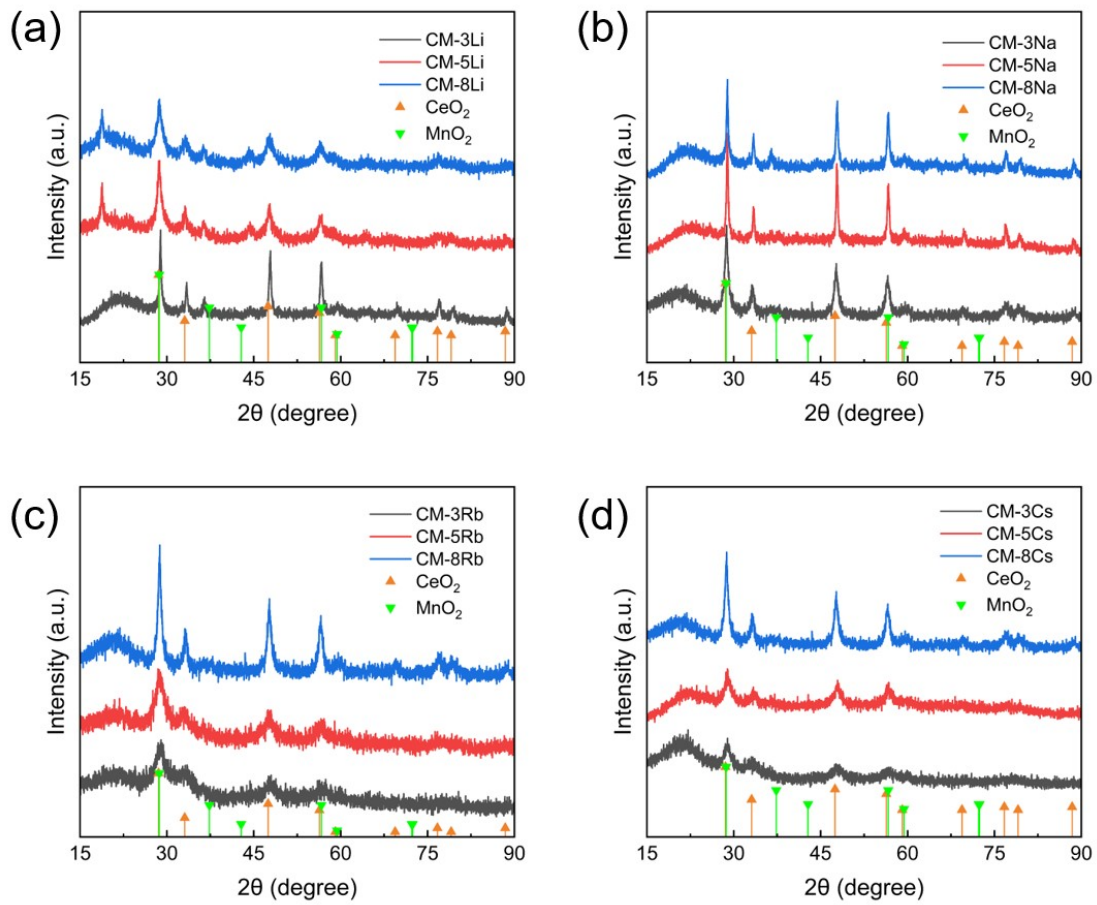

**Fig. S7** XRD of (a)CM-Li, (b)CM-Na, (c)CM-Rb, (c)CM-Cs



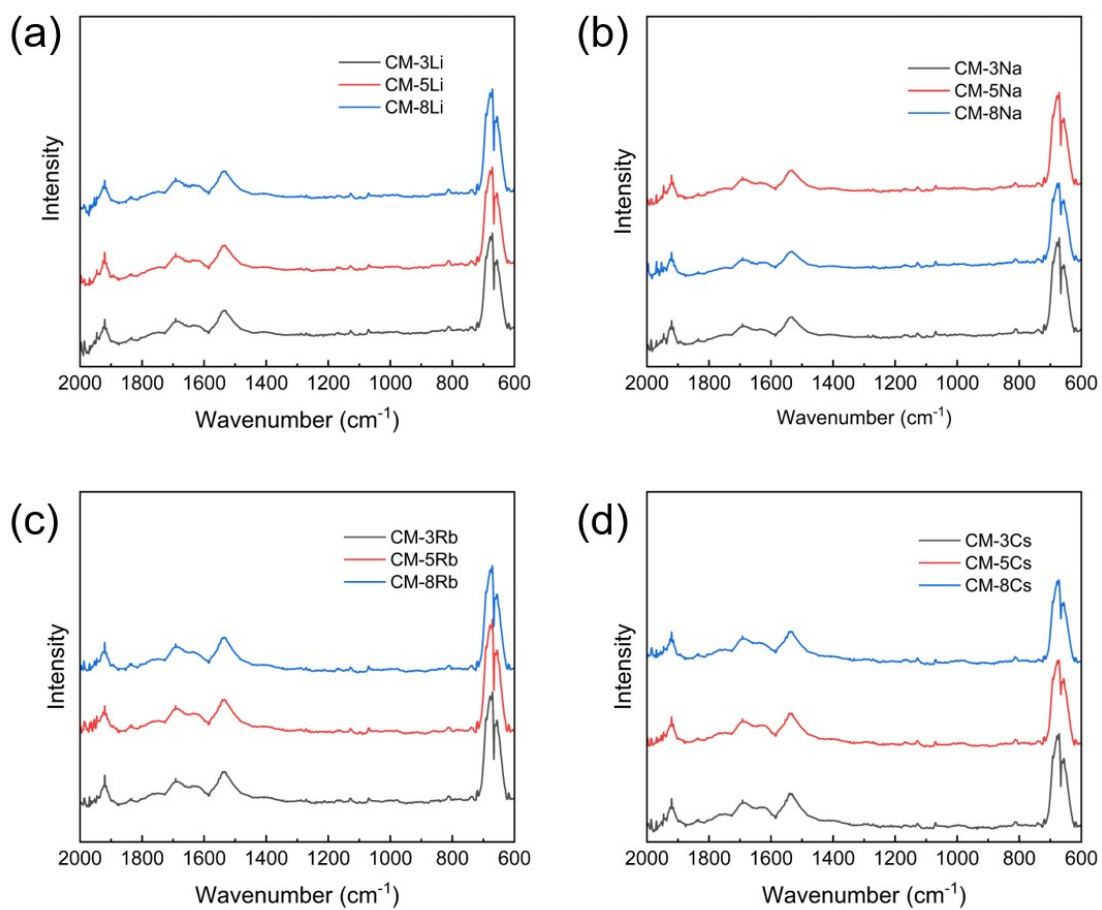

**Fig. S8** IR of (a)CM-Li、(b)CM-Na、(c)CM-Rb、(c)CM-Cs

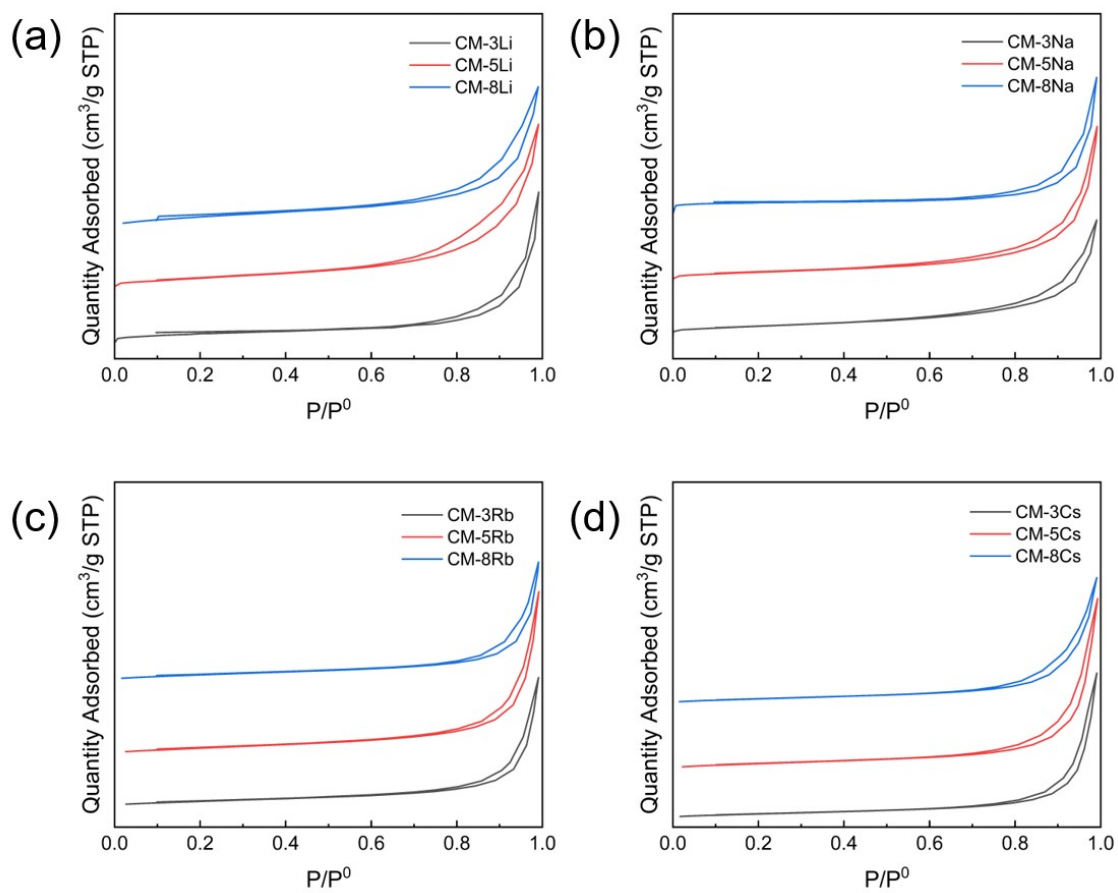

**Fig. S9** BET of (a)CM-Li、(b)CM-Na、(c)CM-Rb、(c)CM-Cs

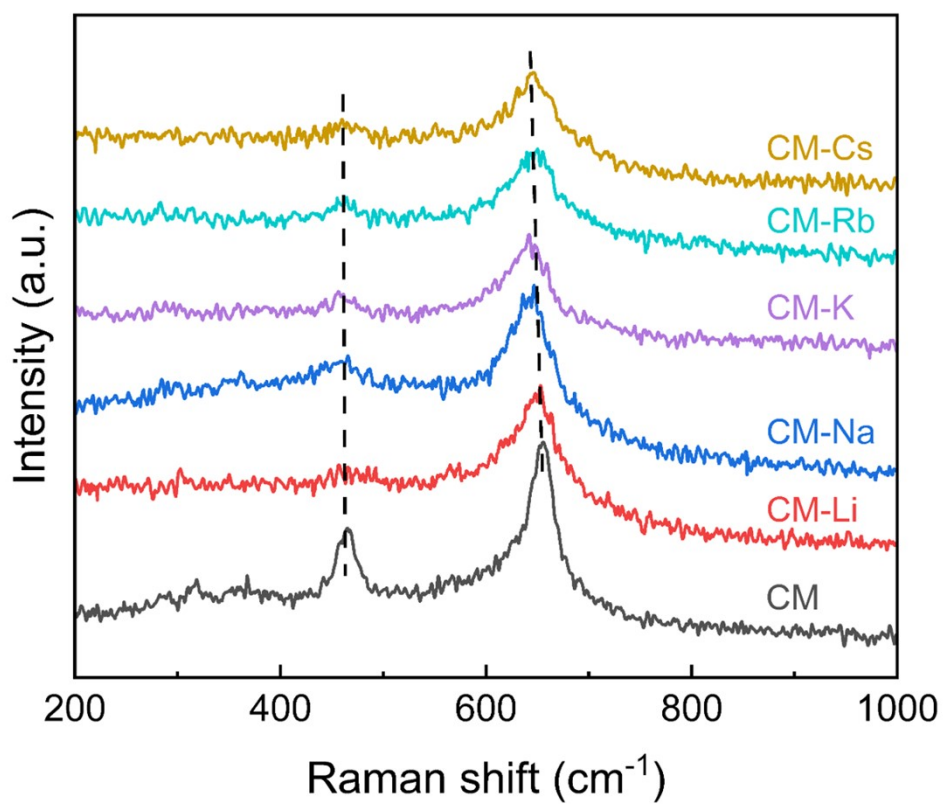

**Fig. S10** Raman of CM, CM-Li, CM-Na, CM-Na, CM-Rb, CM-Cs

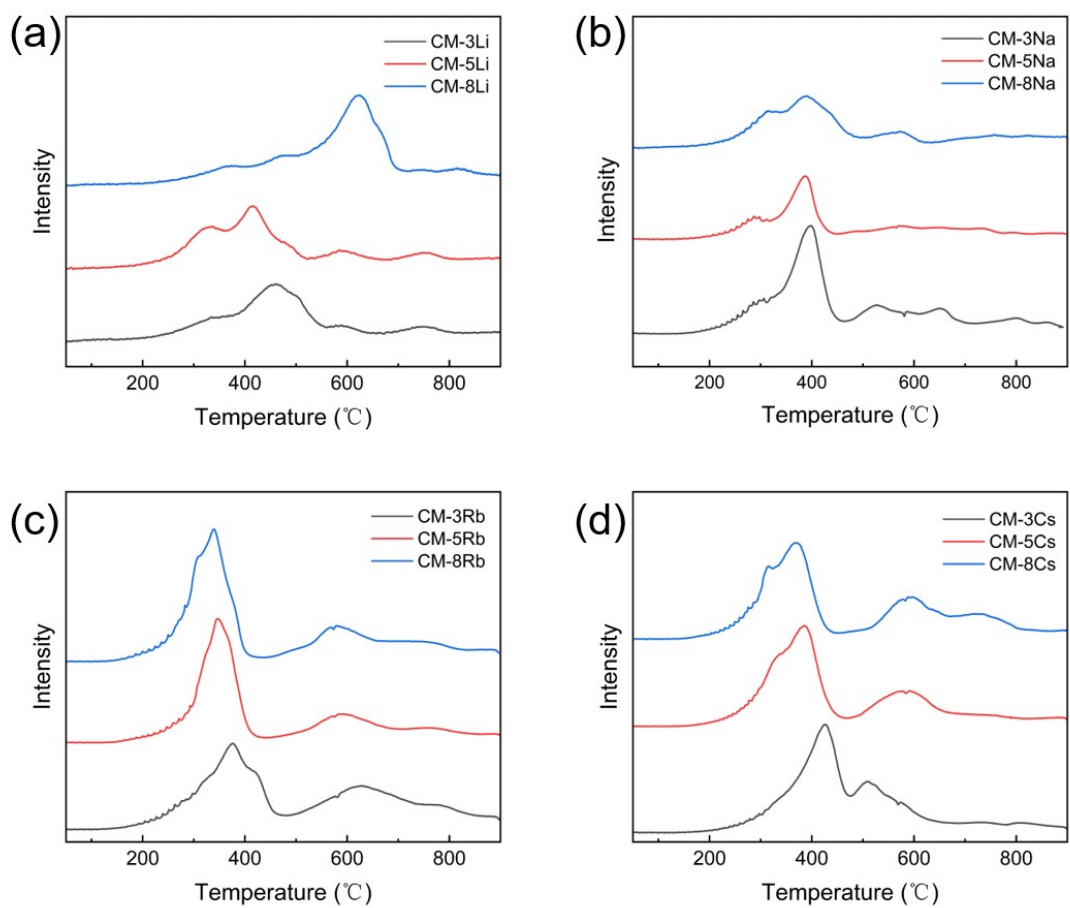

**Fig. S11** H<sub>2</sub>-TPR of (a)CM-Li, (b)CM-Na, (c)CM-Rb, (c)CM-Cs

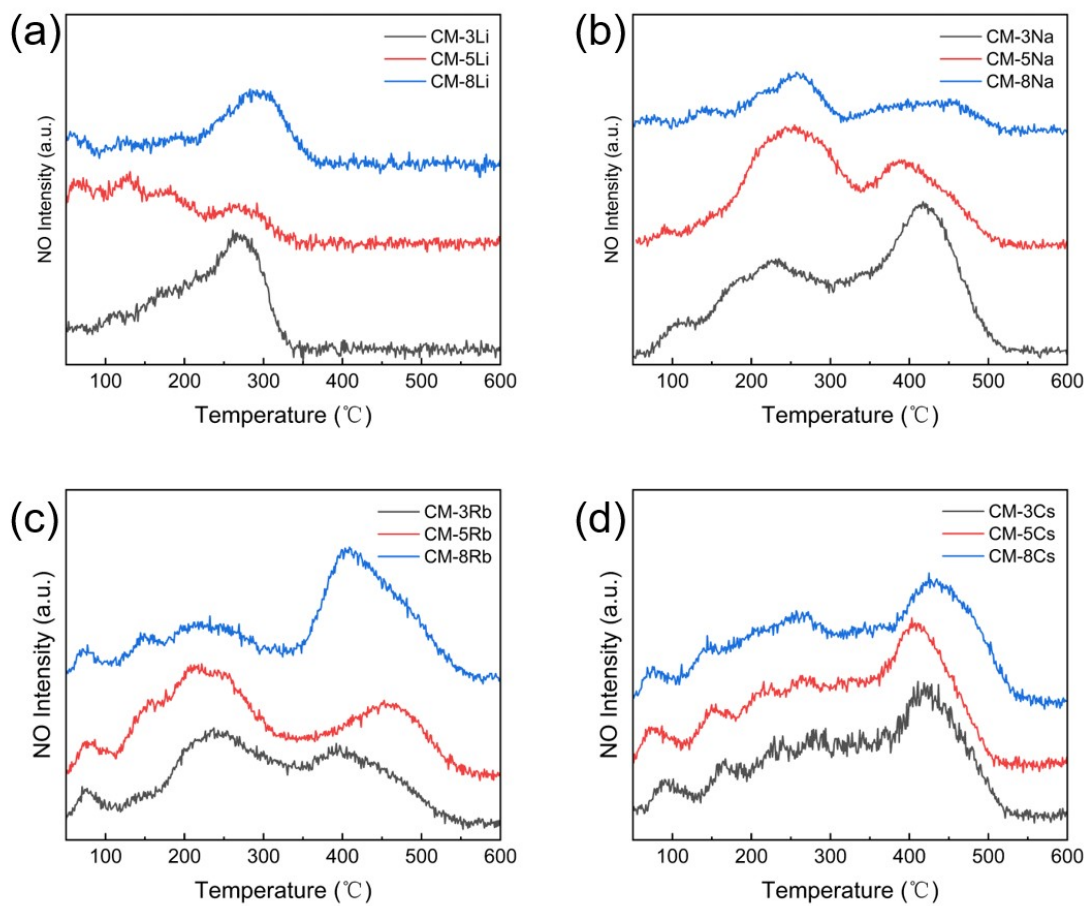

**Fig. S12** NO-TPD of (a)CM-Li, (b)CM-Na, (c)CM-Rb, (c)CM-Cs

**Table S1** Elemental composition of CM-5K

| Element | Content(%) |
|---------|------------|
| Ce      | 30.8       |
| Mn      | 60.0       |
| K       | 9.2        |
| SUM     | 100        |

**Table S2** The BET surface area of catalyst

| Catalysts | Surface area(m <sup>2</sup> /g) |
|-----------|---------------------------------|
| CM-3Li    | 47.2                            |
| CM-5Li    | 62.1                            |
| CM-8Li    | 54.9                            |
| CM-3Na    | 50.8                            |
| CM-5Na    | 61.3                            |
| CM-8Na    | 50.2                            |
| CM-3Rb    | 51.3                            |
| CM-5Rb    | 66.5                            |
| CM-8Rb    | 57.6                            |
| CM-3Cs    | 51.4                            |
| CM-5Cs    | 63.7                            |
| CM-8Cs    | 54.0                            |
